# Supplementary material for: MYCL is a target of a BET bromodomain inhibitor, JQ1, on growth suppression efficacy in small cell lung cancer cells
Source: PubMed Central journal article supplement (PMC5363592; doi:10.18632/oncotarget.12671), 2016-10-14
Supplement: oncotarget-07-77378-s001.pdf [file oncotarget-07-77378-s001.pdf]

## MYCL is a target of a BET bromodomain inhibitor, JQ1, on growth suppression efficacy in small cell lung cancer cells

### SUPPLEMENTARY FIGURES AND TABLES

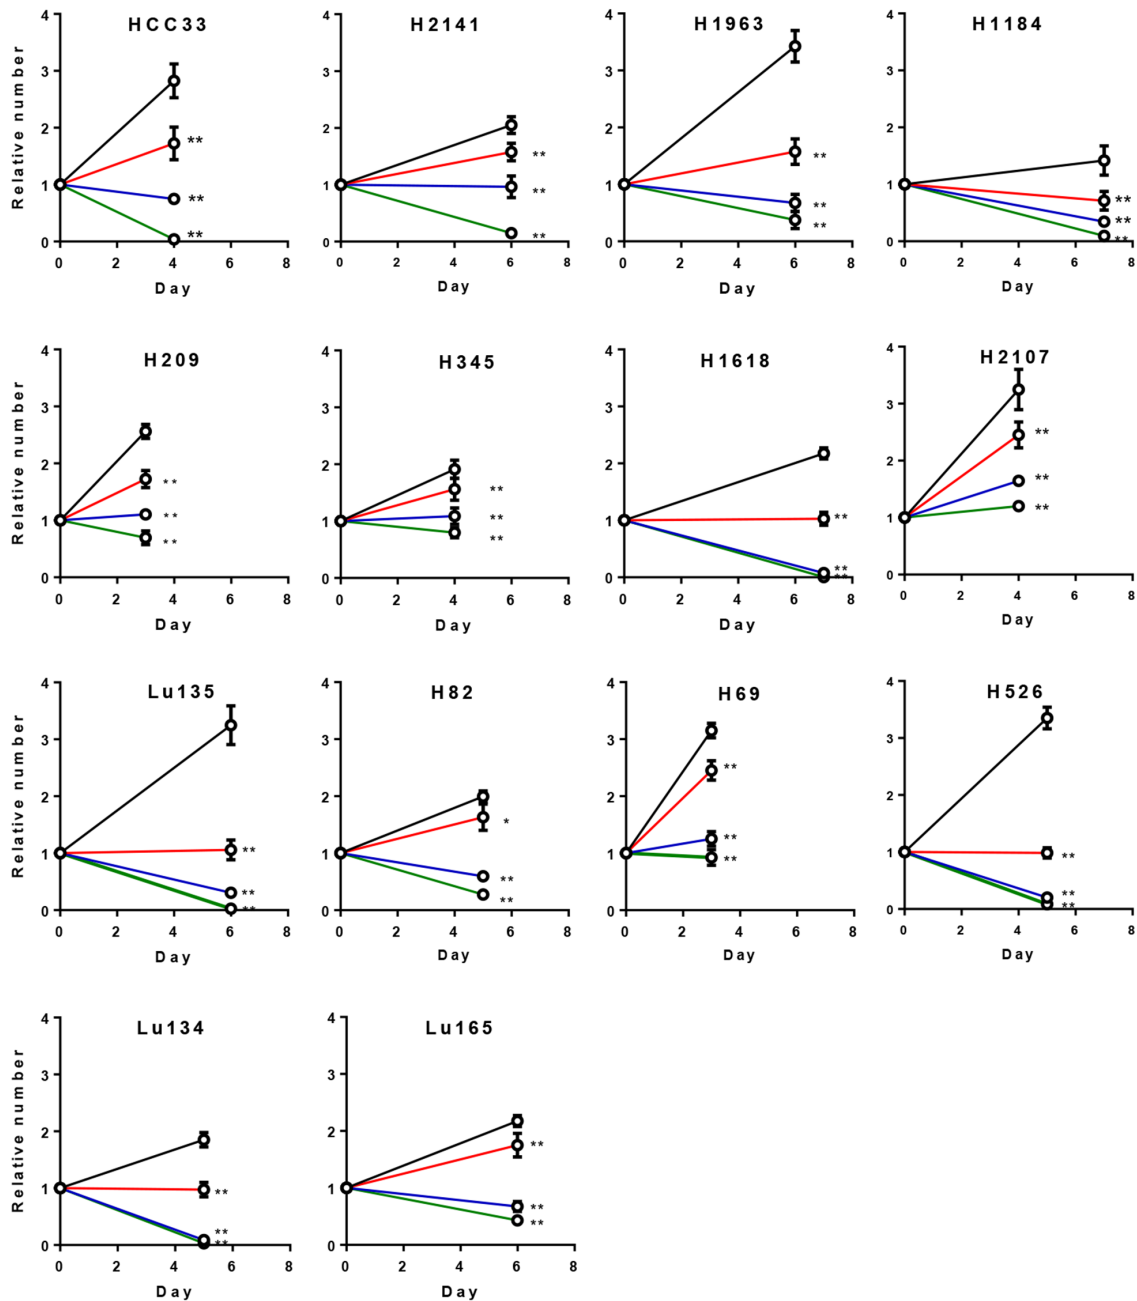

**Supplementary Figure S1: Growth reduction of SCLC cell lines by JQ1 treatment.** The cells were cultured for 3 to 7 days with and without JQ1. Black, red, blue, and green lines represent 0.0, 0.1, 1.0, and 10.0 μM of JQ1-treated cells, respectively. The numbers of cells were counted by a dye exclusion trypan blue assay at the time of plating (day 0) and after 3 to 7 days of JQ1 treatment. \*p<0.05, \*\*p<0.01 by unpaired t-test.

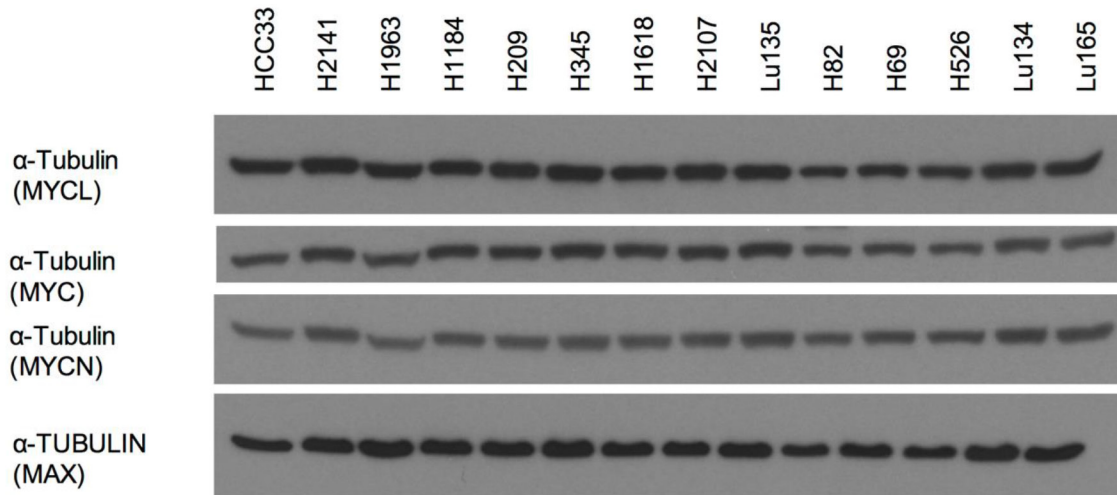

**Supplementary Figure S2: Expression of  $\alpha$ -Tubulin in 14 SCLC cell lines.** These four membranes were used for detection of MYCL, MYC, MYCN and MAX proteins, respectively, in Figure 1.

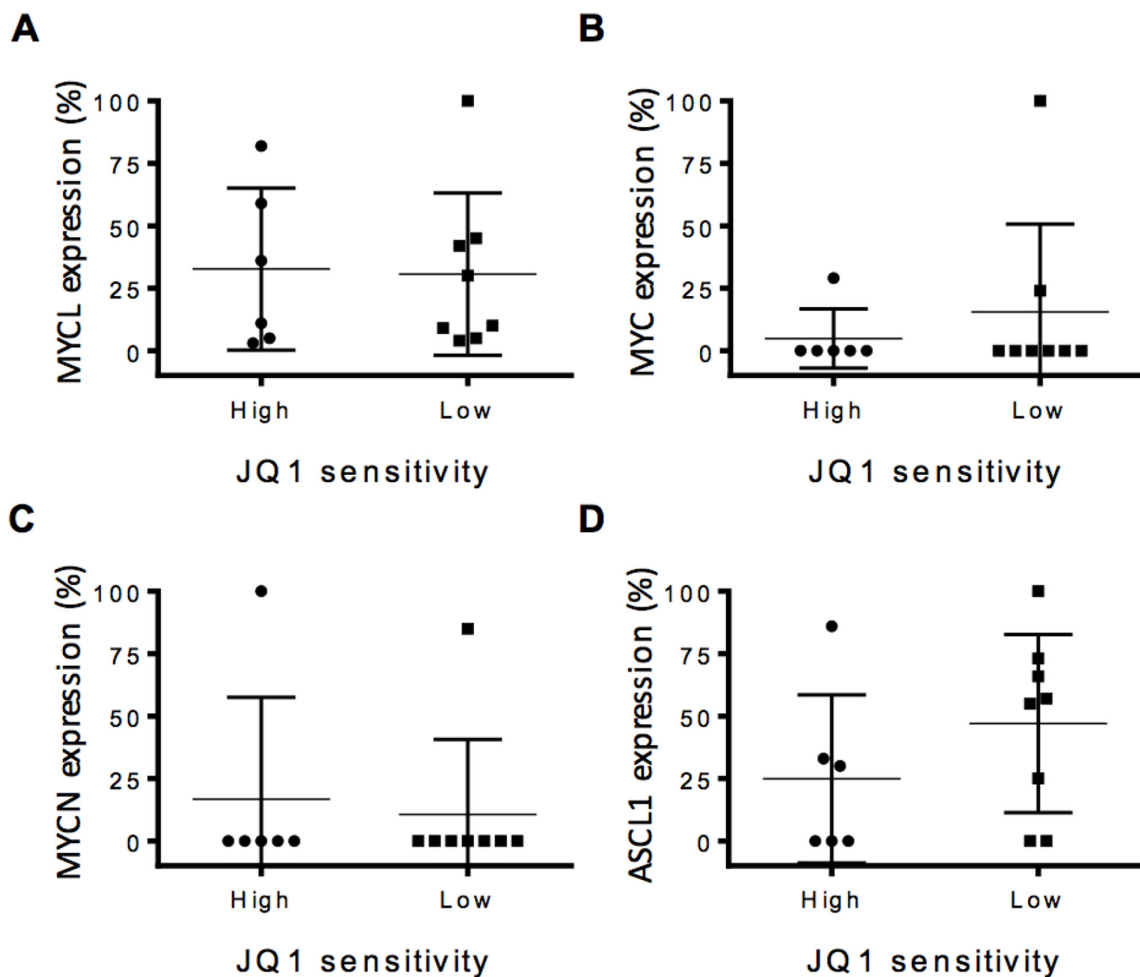

**Supplementary Figure S3: Association between JQ1 sensitivities and expression of MYCL, MYC, MYCN and ASCL1 proteins in SCLC cell lines.** Cell lines with  $GI_{50}$  less than  $1 \mu M$  and more than  $1 \mu M$  were defined as high and low sensitive lines to JQ1. There were no significant associations between JQ1 sensitivity and expression of MYCL **A**, MYC **B**, MYCN **C**, and ASCL1 **D**.

Supplementary Table S1: Effects of JQ1 on the transcription of *MYCL* and known JQ1 target genes in SCLC cell lines

| Cell line | JQ1 treatment | MYCL | MYCN | MYC  | ASCL1 | FOSL1 | BCL2 | CDK6 | IL7R | RUNX2 | CDC25B |
|-----------|---------------|------|------|------|-------|-------|------|------|------|-------|--------|
| HCC33     | -             | 9570 | 407  | 243  | 353   | 426   | 675  | 442  | 64   | 192   | 2350   |
|           | +             | 8230 | 391  | 265  | 381   | 443   | 624  | 315  | 68   | 201   | 2254   |
| H2141     | -             | 3827 | 463  | 245  | 7708  | 434   | 997  | 272  | 72   | 188   | 2954   |
|           | +             | 2722 | 437  | 247  | 6747  | 457   | 768  | 286  | 69   | 200   | 2531   |
| H1963     | -             | 6833 | 361  | 216  | 2655  | 411   | 561  | 499  | 65   | 190   | 1888   |
|           | +             | 7354 | 412  | 241  | 1006  | 429   | 458  | 485  | 65   | 216   | 1490   |
| H345      | -             | 1144 | 445  | 273  | 8560  | 467   | 2856 | 297  | 72   | 201   | 2422   |
|           | +             | 1016 | 595  | 339  | 7164  | 583   | 1556 | 349  | 79   | 258   | 1877   |
| H1618     | -             | 2873 | 566  | 253  | 8200  | 484   | 998  | 1227 | 70   | 263   | 3126   |
|           | +             | 1947 | 492  | 238  | 8551  | 446   | 707  | 897  | 67   | 231   | 2308   |
| H2107     | -             | 981  | 425  | 1559 | 8480  | 513   | 2223 | 298  | 76   | 202   | 2448   |
|           | +             | 921  | 448  | 1966 | 4682  | 603   | 1293 | 304  | 79   | 214   | 2233   |
| Lu135     | -             | 587  | 364  | 1923 | 354   | 406   | 452  | 1501 | 70   | 177   | 2630   |
|           | +             | 619  | 345  | 2207 | 224   | 416   | 443  | 668  | 67   | 192   | 2051   |
| H82       | -             | 996  | 456  | 4829 | 509   | 354   | 348  | 1354 | 64   | 209   | 1373   |
|           | +             | 1048 | 433  | 4929 | 323   | 363   | 317  | 877  | 61   | 194   | 1082   |
| H69       | -             | 669  | 1004 | 267  | 4865  | 451   | 915  | 417  | 68   | 192   | 2302   |
|           | +             | 614  | 821  | 267  | 2689  | 408   | 607  | 334  | 69   | 177   | 2504   |
| H526      | -             | 776  | 1662 | 226  | 234   | 428   | 995  | 1229 | 65   | 280   | 2746   |
|           | +             | 759  | 1333 | 247  | 305   | 496   | 619  | 709  | 68   | 261   | 2587   |
| Lu134     | -             | 661  | 372  | 258  | 2533  | 433   | 491  | 1095 | 68   | 193   | 2847   |
|           | +             | 618  | 366  | 278  | 2265  | 420   | 350  | 587  | 67   | 184   | 2687   |
| Lu165     | -             | 775  | 418  | 247  | 7987  | 420   | 501  | 389  | 68   | 203   | 2068   |
|           | +             | 839  | 415  | 241  | 4114  | 417   | 348  | 340  | 64   | 182   | 1583   |

Supplementary Table S2: Comparison of GI<sub>50</sub> values for JQ1 in SCLC cell lines among three studies

| Cell line | GI <sub>50</sub> value (µg/ml) |                |             |
|-----------|--------------------------------|----------------|-------------|
|           | This study                     | Lenhart et al. | Kaur et al. |
| Lu134     | <0.1                           |                |             |
| H1184     | <0.1                           |                |             |
| H526      | <0.1                           | 0.994          | 0.11        |
| H1618     | <0.1                           |                |             |
| Lu135     | <0.1                           | 0.015          |             |
| H1963     | <0.1                           |                | 0.26        |
| HCC33     | 0.13                           | 0.063          |             |
| H82       | 0.18                           | 1.140          | 1.00        |
| Lu165     | 0.19                           |                |             |
| H2141     | 0.22                           | 0.989          |             |
| H209      | 0.52                           |                |             |
| H69       | 0.54                           | 0.144          | 0.23        |
| H2107     | 1.1                            |                | 0.13        |
| H345      | 1.23                           |                | >10.0       |
| H211      |                                | 0.025          | 0.23        |
| H446      |                                | 0.035          | 0.12        |
| H2171     |                                | 0.175          | 0.22        |
| H196      |                                | 4.27           | 1.16        |

GI<sub>50</sub> values of these cell lines were obtained from the data shown in Figure 2 in this study and from references 20 and 35. The GI<sub>50</sub> values were not described in the paper by Kaur et al., thus, were calculated from the data shown in Figure 4 in the paper.
